# Supplementary material
Source: MDPI journal article supplement (https://www.mdpi.com/2076-3263/8/6/211)

## Supplementary Material 1.

ESEM images and corresponding EDS analyses.

Electron Image 2

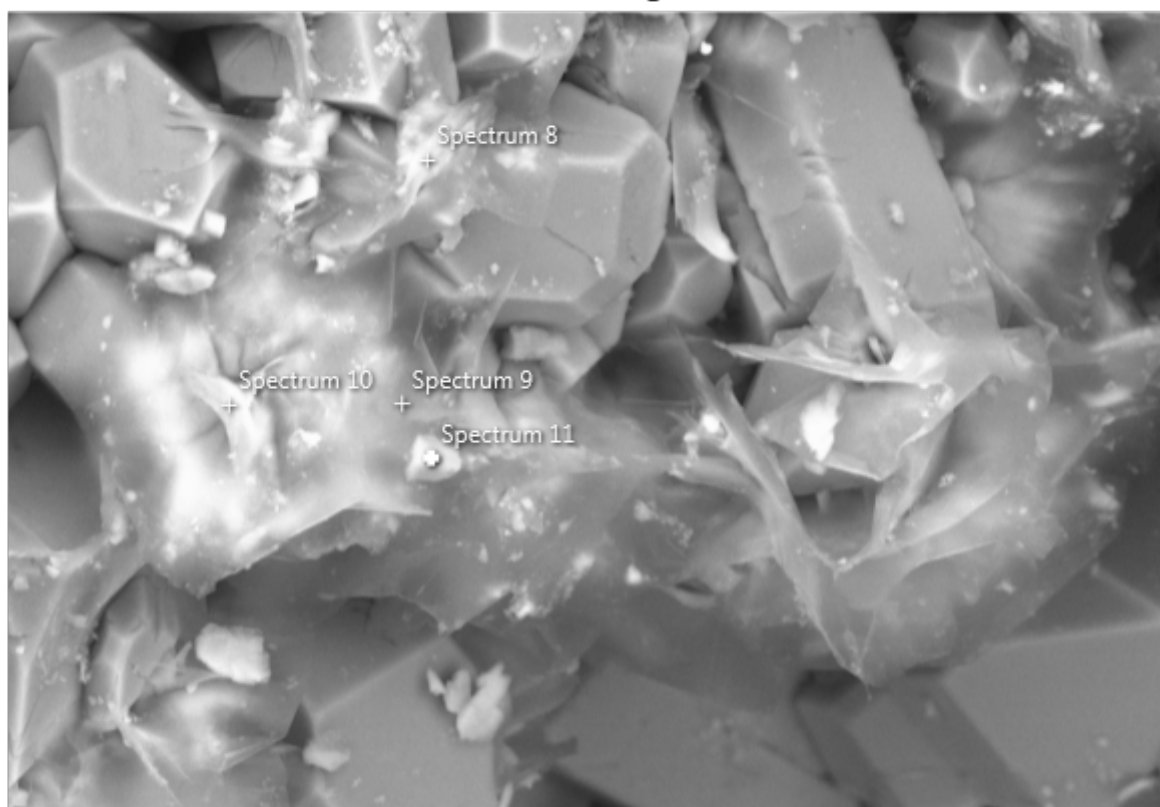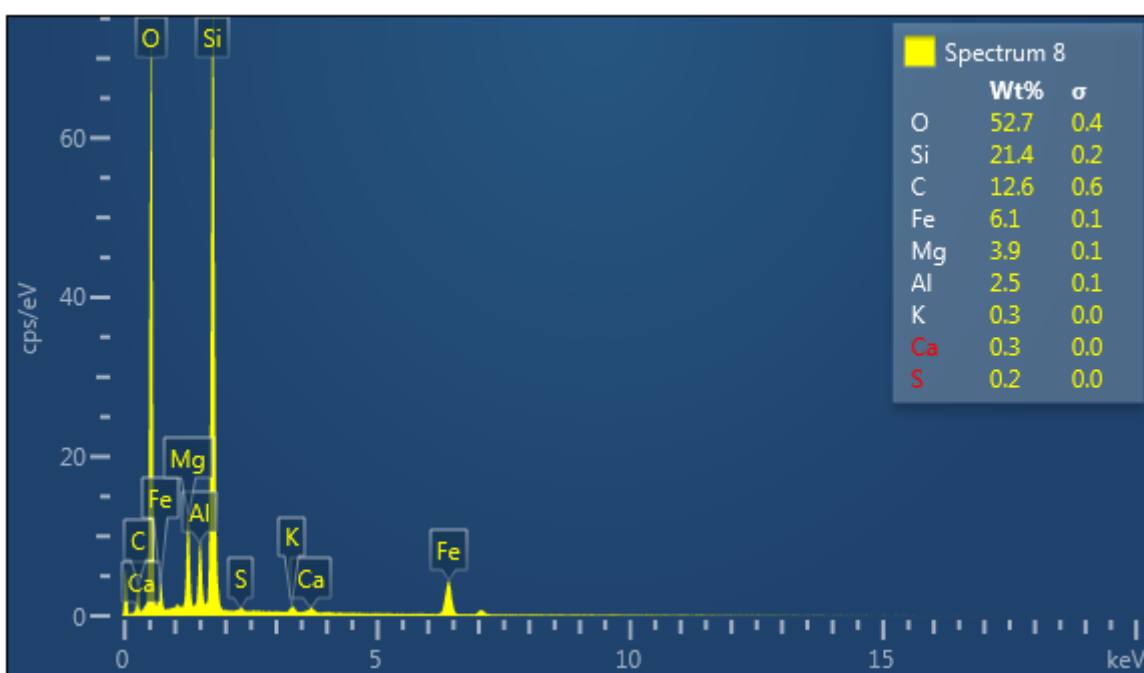

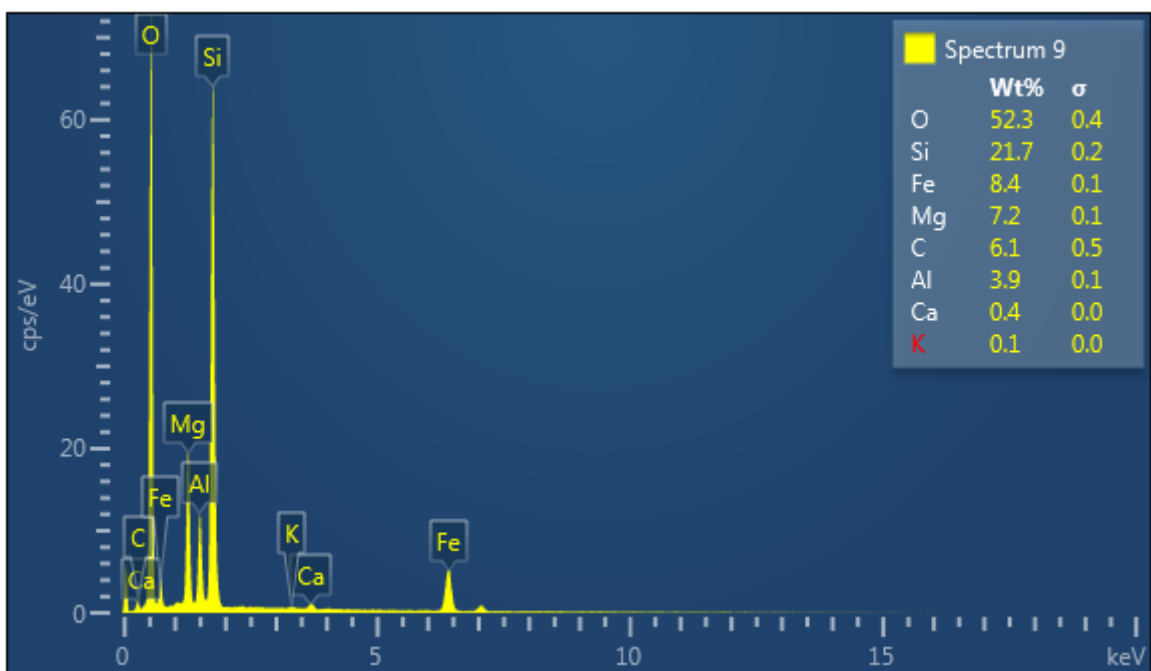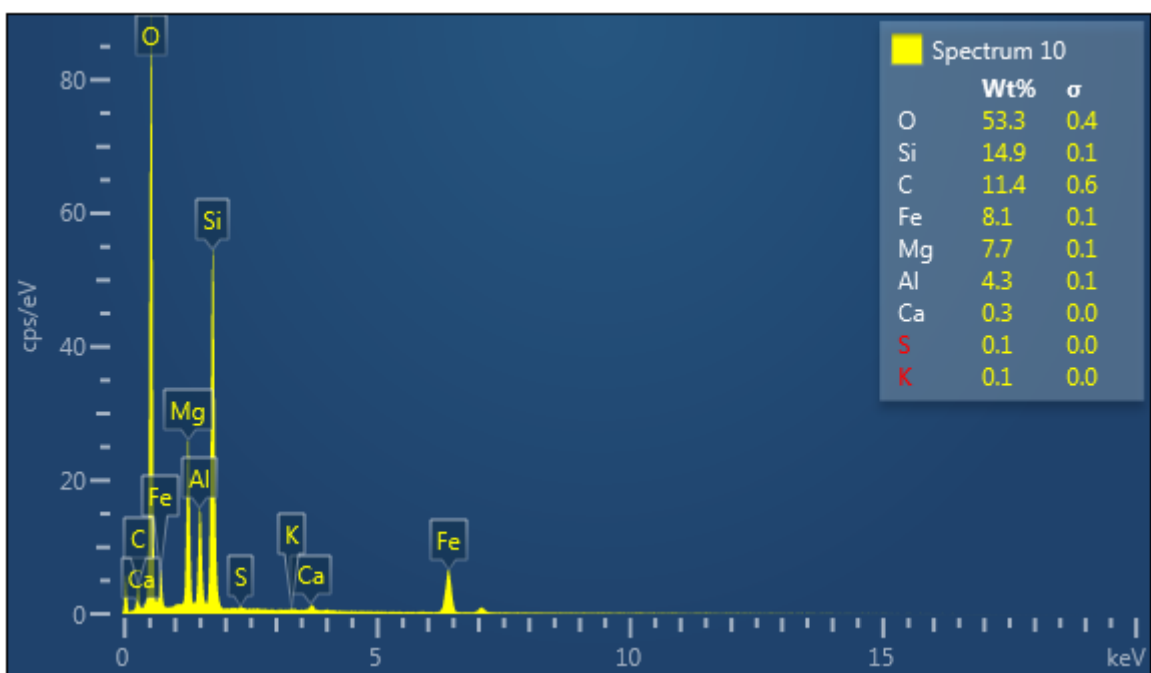

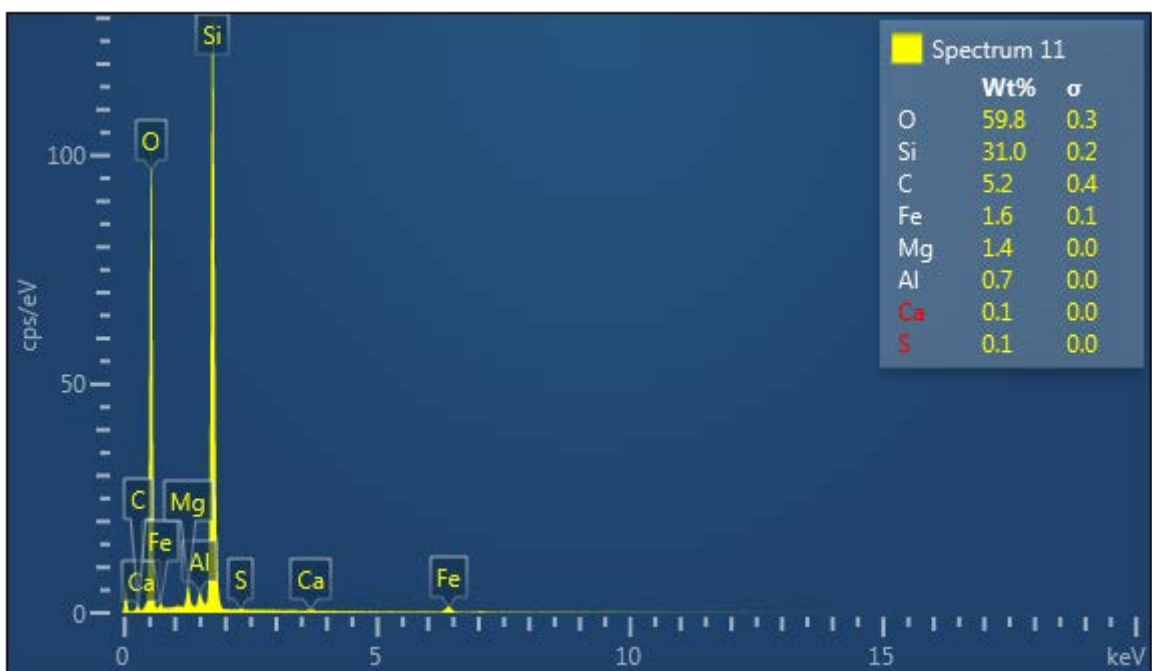

Electron Image 5

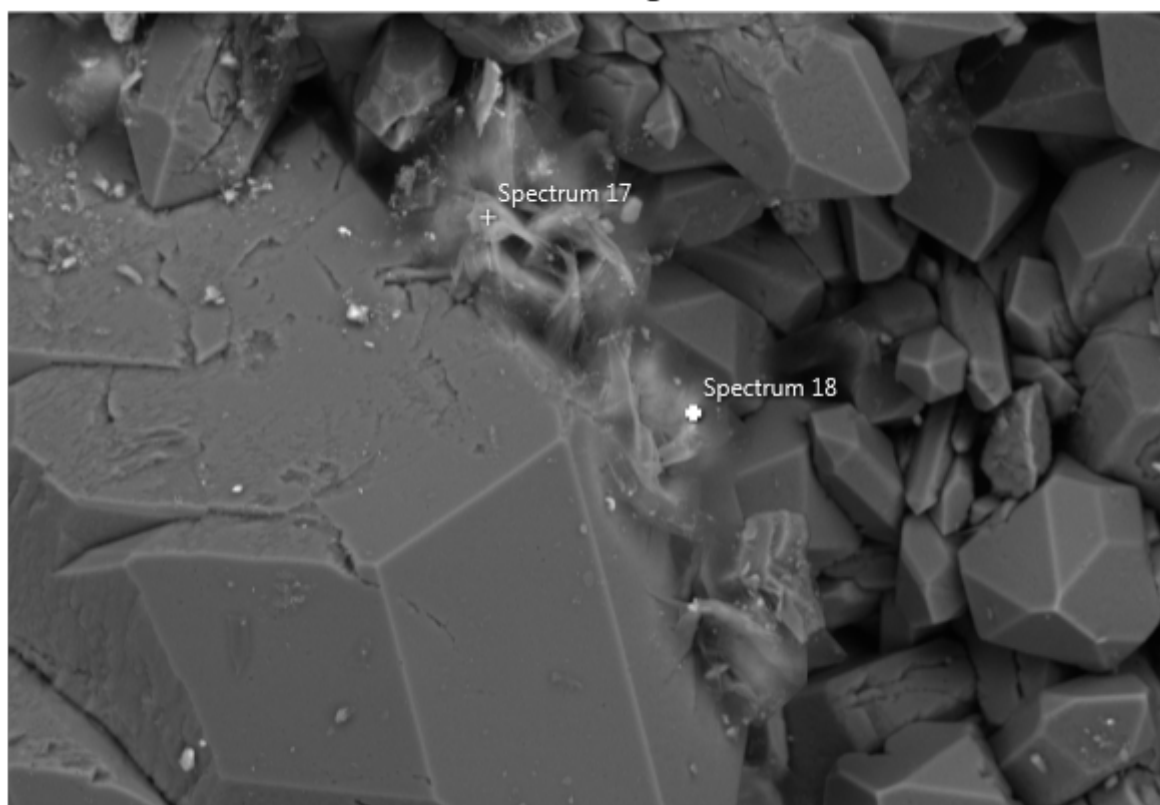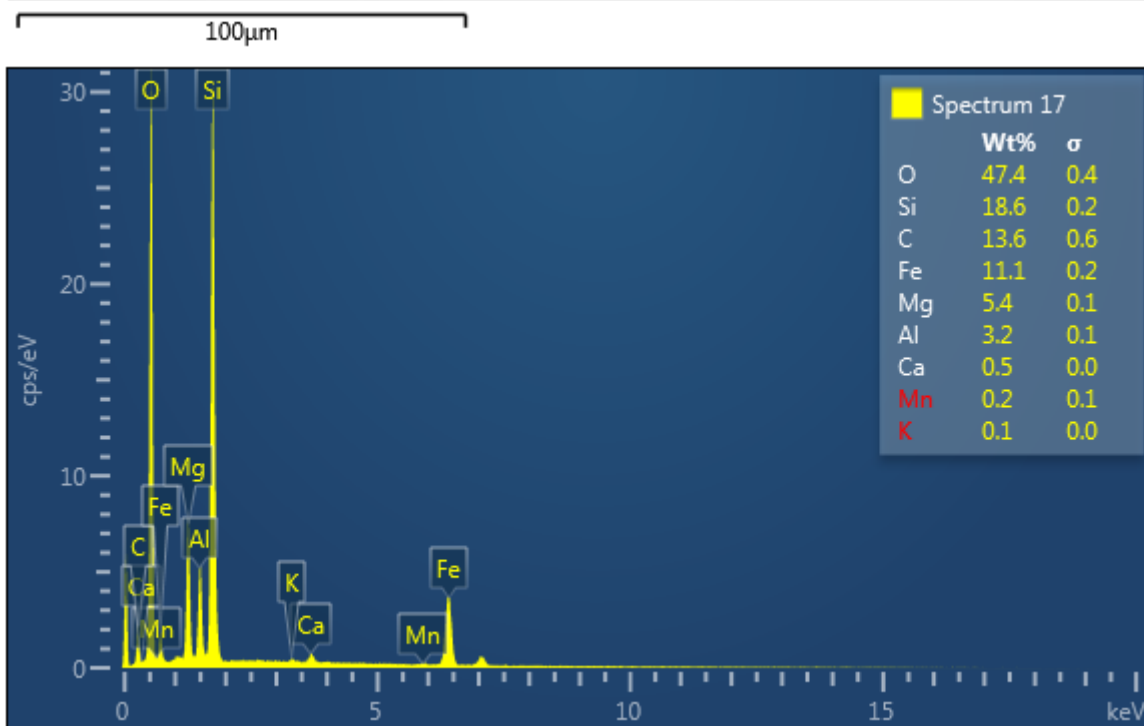

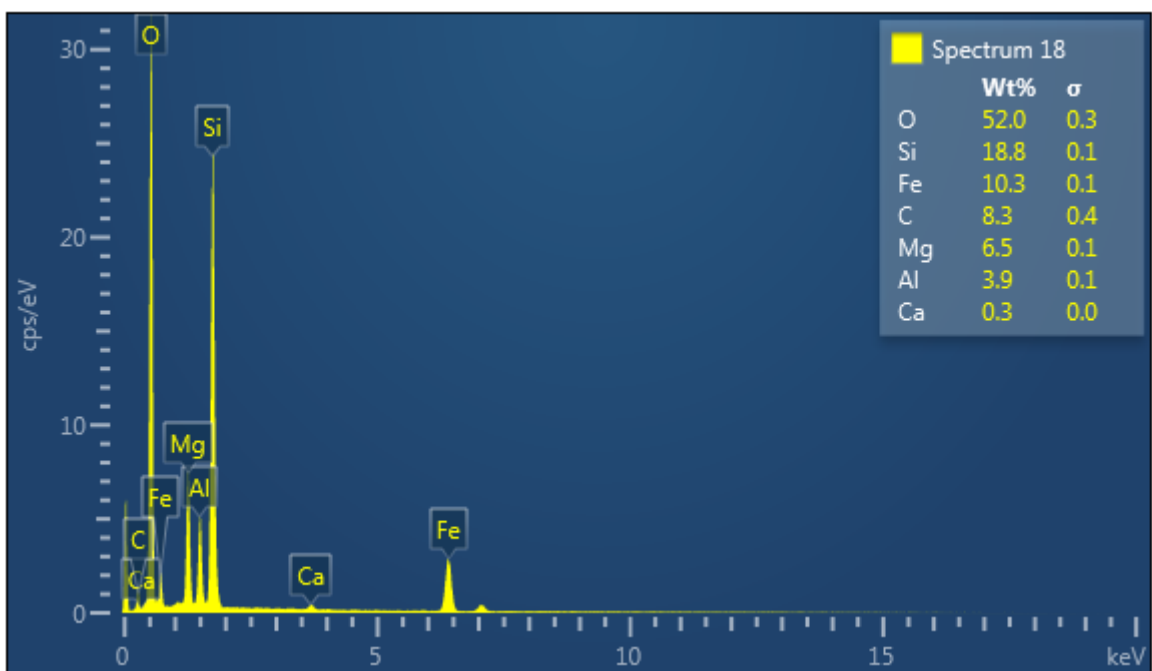

Supplement: s1 [file s1]
